# Supplementary material
Source: HighWire-hosted journal article supplement (http://molpharm.aspetjournals.org/highwire/filestream/77526/field_highwire_adjunct_files/0/Supplementary_104786.pdf)
Supplement: Supplementary_104786.pdf [file Supplementary_104786.pdf]

**Title: Glutamate delta-1 receptor regulates metabotropic glutamate receptor 5 signaling in the hippocampus.**

Authors: Pratyush S. Suryavanshi, Subhash C. Gupta, Roopali Yadav, Varun Keshewani, Jinxiu Liu and Shashank M. Dravid

Journal Title: Molecular Pharmacology

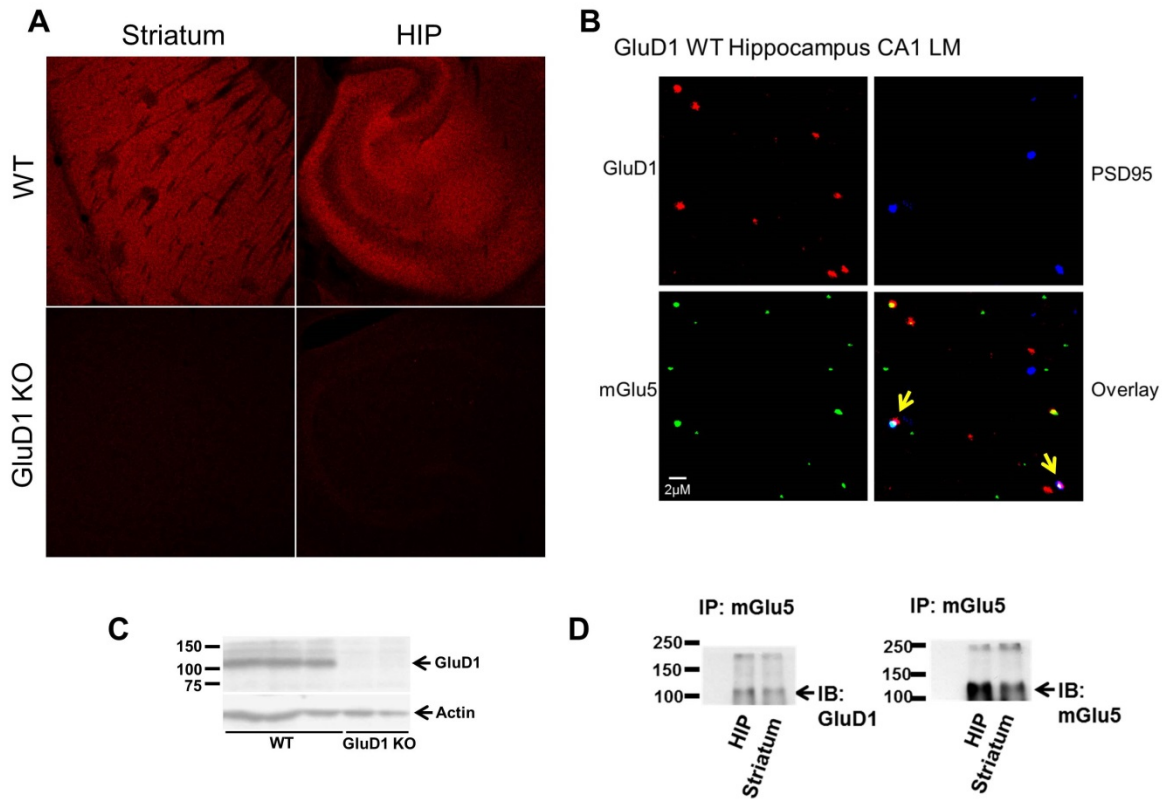

**Supplementary Figure 1: Interaction between GluD1 and mGlu5.** A] Selectivity of the GluD1 antibody for immunohistochemistry is depicted in both striatum and hippocampus. Negligible staining was observed in GluD1 KO. B] Some of the puncta for GluD1 (red) and mGlu5 (green) co-localized with PSD95 (blue) indicating their synaptic localization. C] Selectivity of GluD1 antibody in western blotting was observed. D] Immunoprecipitation of GluD1 along with mGlu5 was observed in membrane fraction from both hippocampus and striatum.
